# Supplementary material
Source: PubMed Central journal article supplement (PMC4683556)
Supplement: Supp_Figure2.pdf [file Supp_Figure2.pdf]

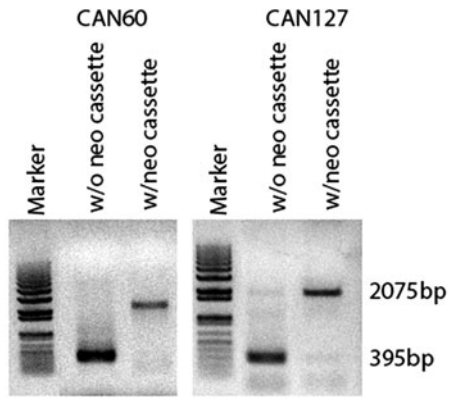

Ngn2\_loxp\_del-F: caccccaacttgtttattgcagctt  
 Ngn2\_loxp\_del-R: aaacaaccgaggaatcagaaaggct

**SUPPLEMENTARY FIG. S2.** Successful excision of the floxed neo cassette in clones that are validated by Southern blot analysis. The floxed neo cassette was removed by transient transfection of a Cre construct as detected by polymerase chain reaction (PCR). Clones with neo cassette yield a PCR product of 2075 bp, while clones without neo cassette have a PCR product of 395 bp. Results from two representative clones CAN60 and CAN127 are shown.
